# Supplementary material
Source: Research Square preprint supplement (doi:10.21203/rs.3.rs-9198323/v1)
Supplement: Supplementary file 1 [file 22889cd9236028eb673ba7b1.docx]

| **Meat** | **Fat** |
| --- | --- |
| 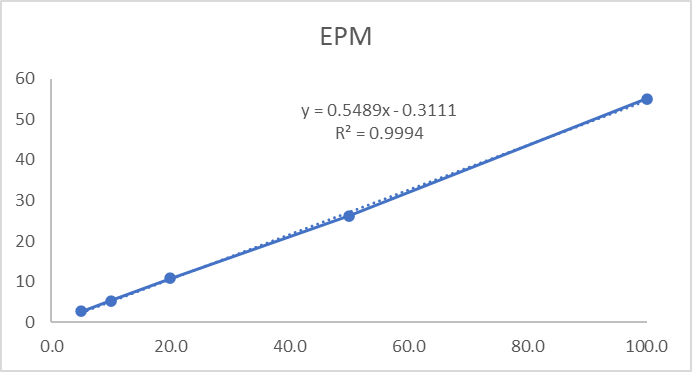 | 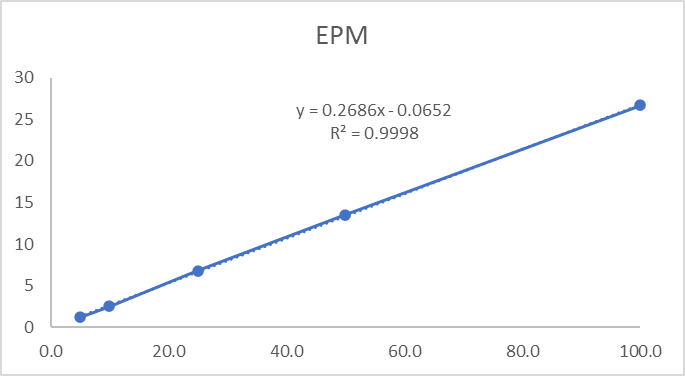 |
| 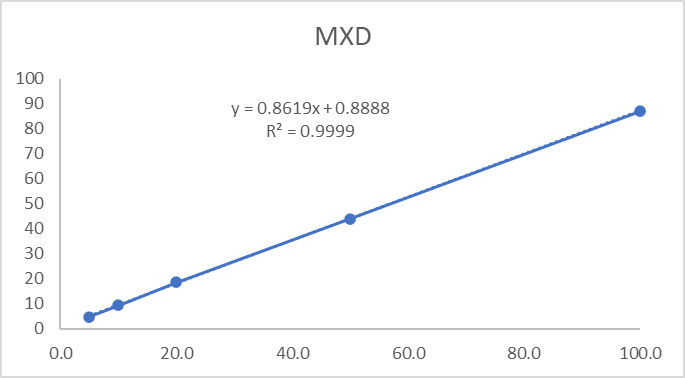 | 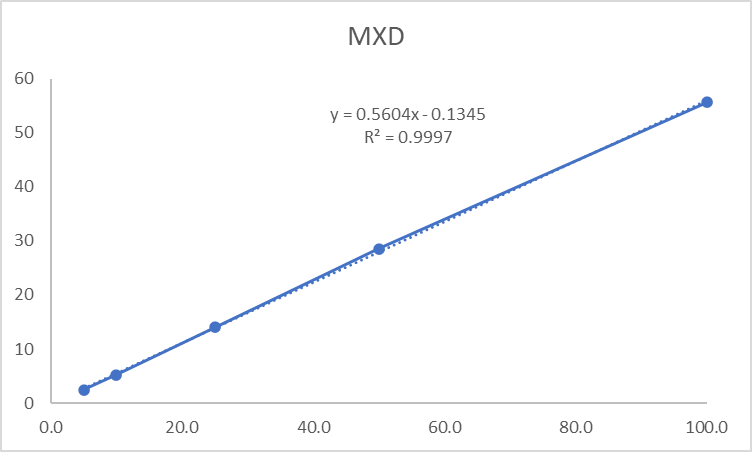 |
| 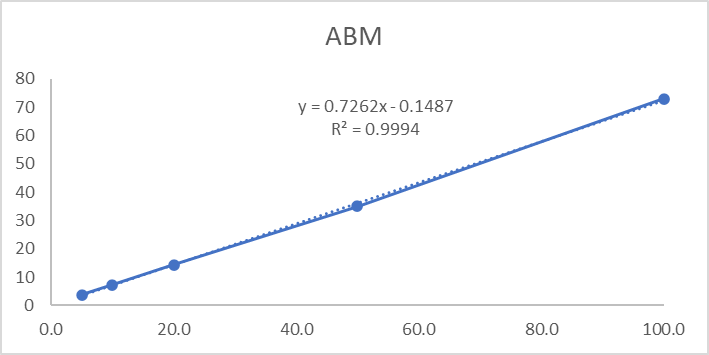 | 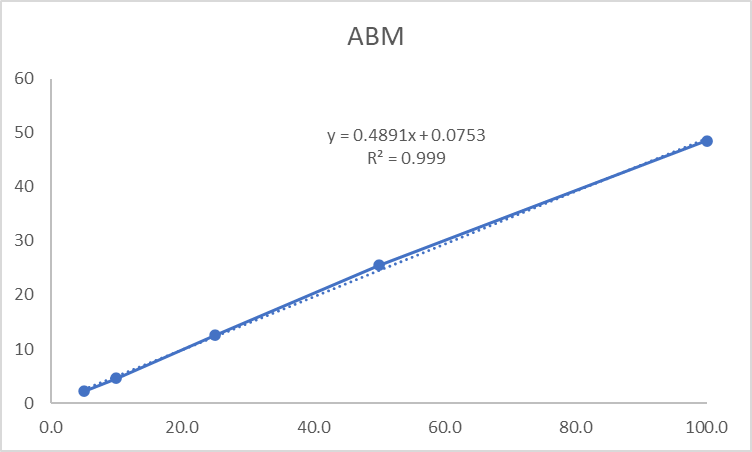 |
| 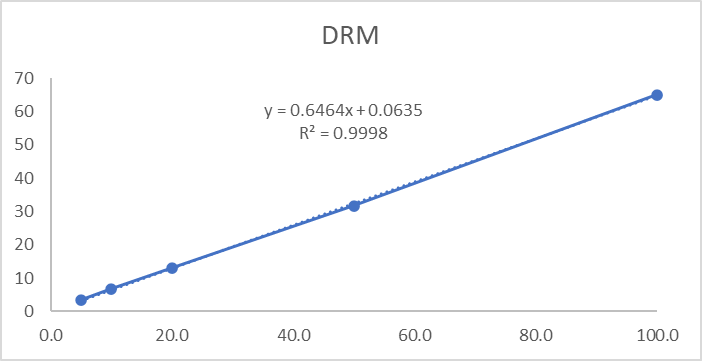 | 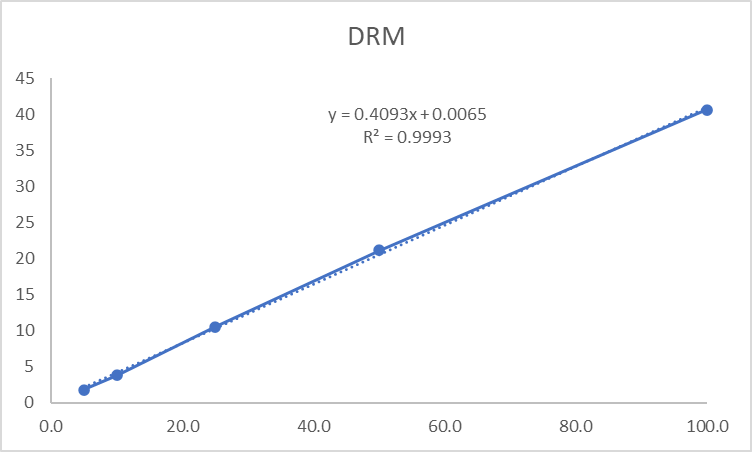 |
| 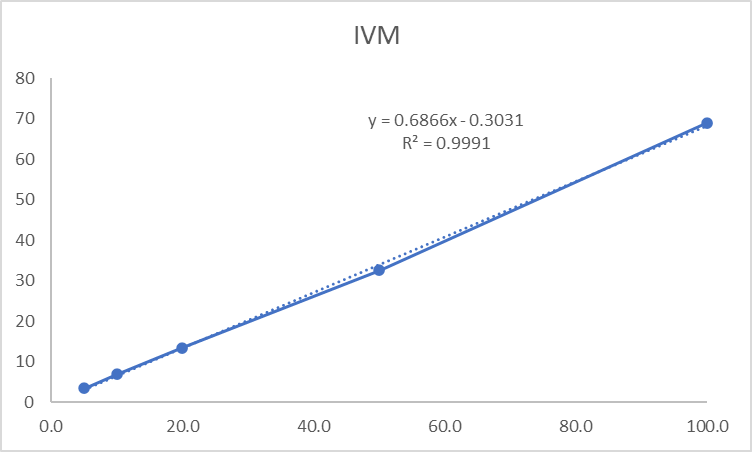 | 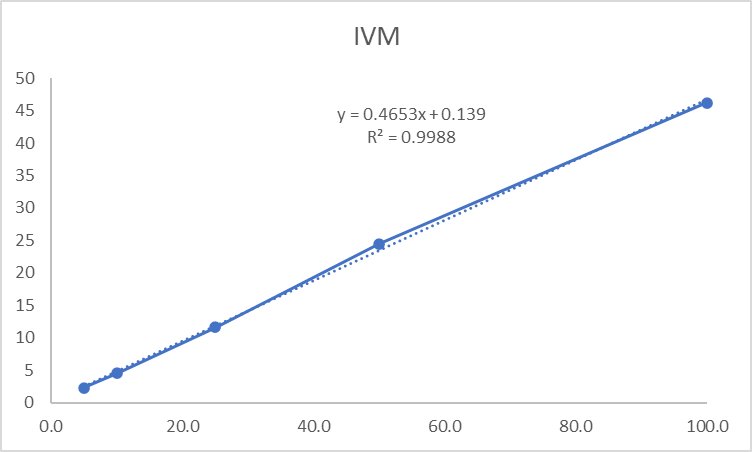 |

**Fig. S1** Calibration curves of MLs [(eprinomectin (EPM), moxidectin (MXD), abamectin (ABM), doramectin (DRM), and ivermectin (IVM)] for meat and fat tissue samples by HPLC-FLD method.

| **Meat** | **Fat** |
| --- | --- |
| M1 | F1 |
| M2 | F2 |
| M3 | F3 |
| M4 | F4 |
| M5 | F5 |
| M6 | F6 |
| M7 | F7 |

**Fig. S2** HPLC-FLD chromatograms [analytic standard mixture (M1 or F1, 25 ng/ml), blank meat (M2) or fat (F2) tissue samples, fortified meat (M3: 5 ng/g, M4: 10 ng/g, M5: 20 ng/g, M6: 50 ng/g and M7: 100 ng/g) and fat (F3: 5 ng/g, F4: 10 ng/g, F5: 20 ng/g, F6: 50 ng/g and F7: 100 ng/g) tissue samples for calibration curves of MLs [(eprinomectin, moxidectin, abamectin, doramectin, and ivermectin, respectively)].

| **Liver** | **Kidney** |
| --- | --- |
| 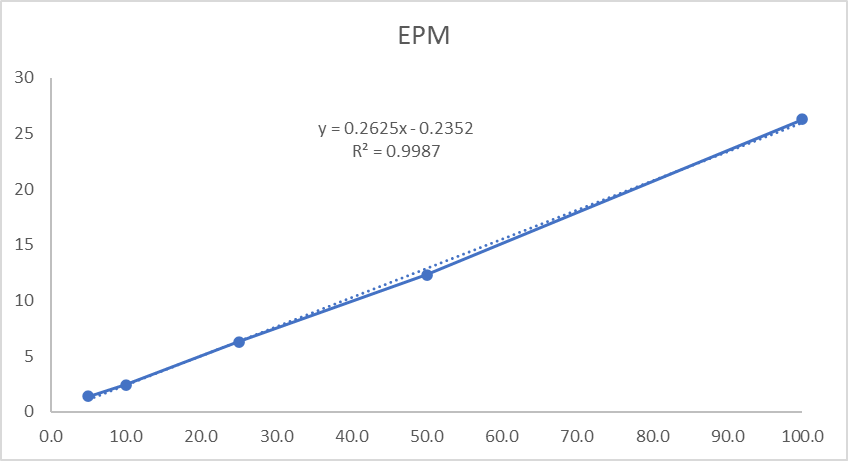 | 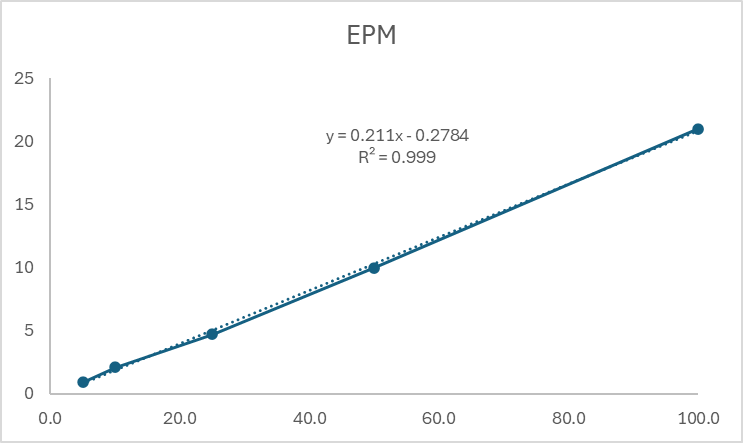 |
| 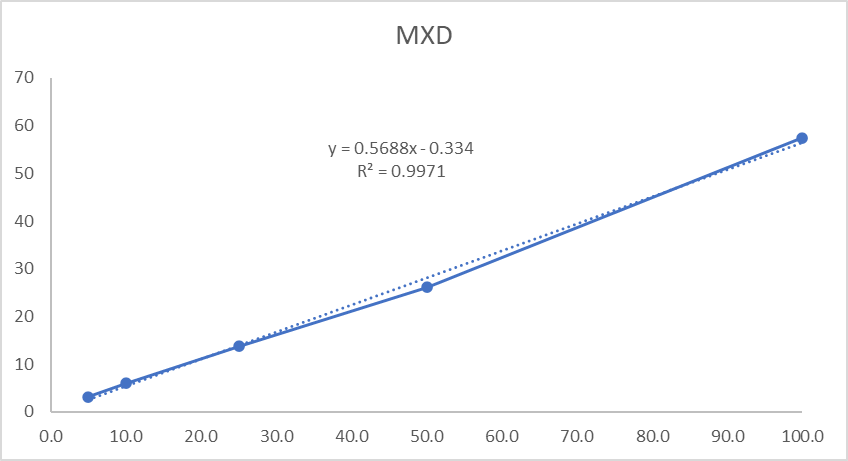 | 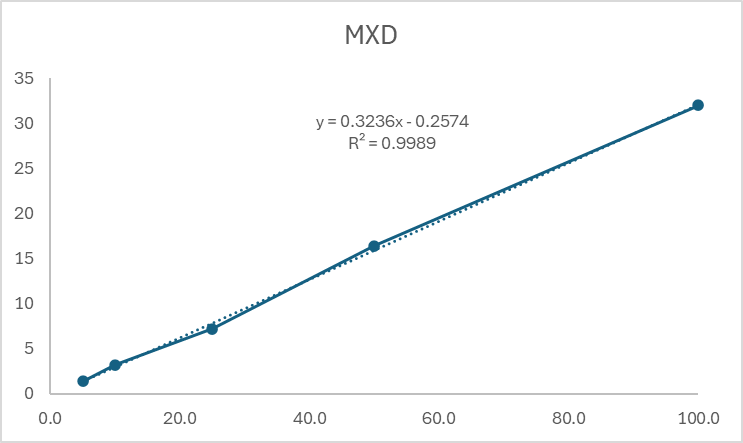 |
| 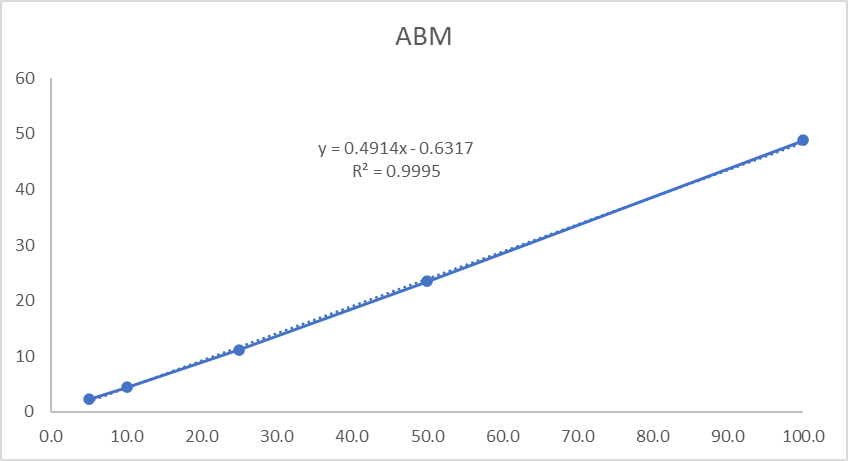 | 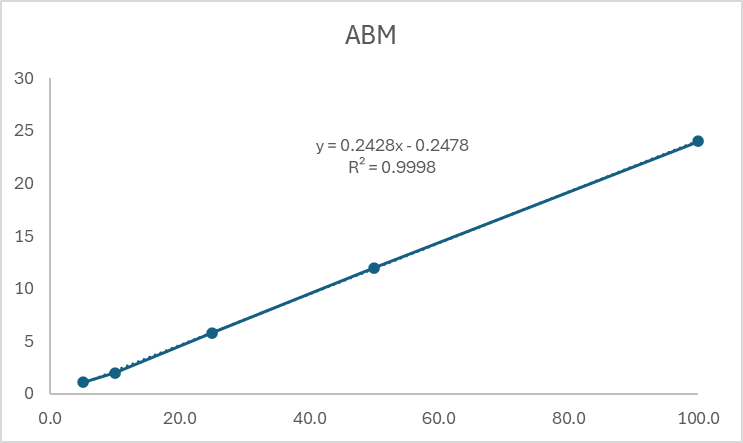 |
| 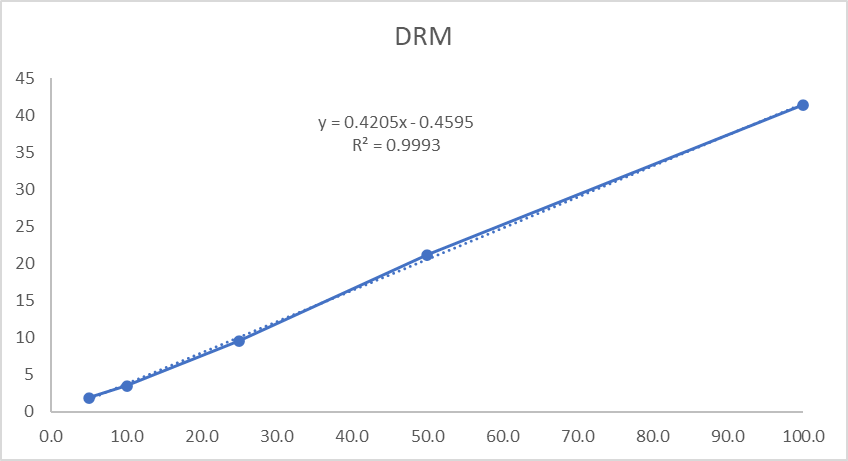 | 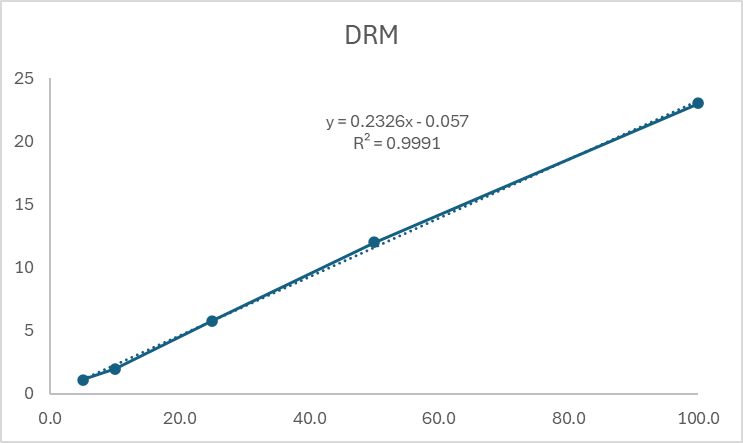 |
| 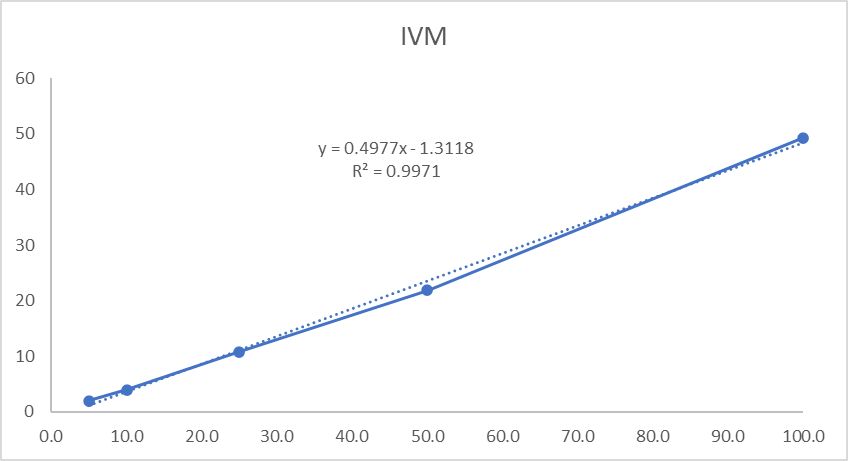 | 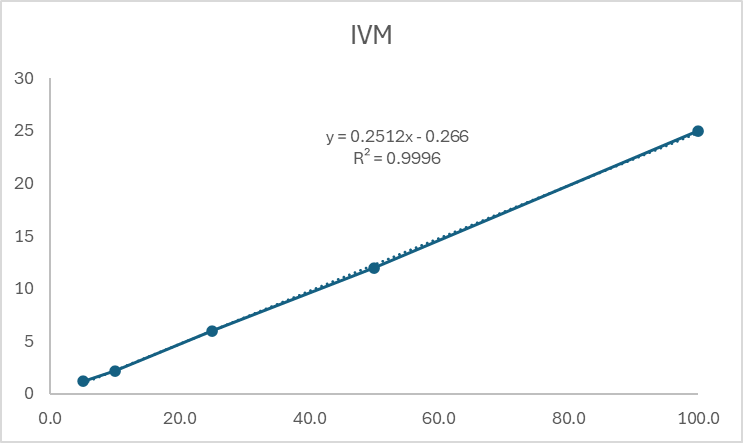 |

**Fig. S3** Calibration curves of MLs [(eprinomectin (EPM), moxidectin (MXD), abamectin (ABM), doramectin (DRM), and ivermectin (IVM)] for liver and kidney tissue samples by HPLC-FLD method.

| **Liver** | **Kidney** |
| --- | --- |
| L1 | K1 |
| L2 | K2 |
| L3 | K3 |
| L4 | K4 |
| L5 | K5 |
| L6 | K6 |
| L7 | K7 |

**Fig. S4** HPLC-FLD chromatograms [analytic standard mixture (L1 or K1, 25 ng/ml), blank liver (L2) or kidney (K2) tissue samples, fortified meat (L3: 5 ng/g, L4: 10 ng/g, L5: 20 ng/g, L6: 50 ng/g, and L7: 100 ng/g) and fat (K3: 5 ng/g, K4: 10 ng/g, K5: 20 ng/g, K6: 50 ng/g, and K7: 100 ng/g) tissue samples for calibration curves of MLs (eprinomectin, moxidectin, abamectin, doramectin, and ivermectin, respectively)].
